# Supplementary material
Source: PubMed Central journal article supplement (PMC9187503)
Supplement: 41267_2022_535_MOESM1_ESM.pdf [file 41267_2022_535_MOESM1_ESM.pdf]

## ONLINE APPENDIX. SUPPLEMENTARY MATERIAL

Table A1. Variables, operationalization, and data sources

| <b>Variables</b>                    | <b>Operationalization</b>                                                                                                                                                                                                                                                                                                                                                                                                                                                                                                                                                                                                                                                                                                                                                                                                                              | <b>Data Source</b>                            |
|-------------------------------------|--------------------------------------------------------------------------------------------------------------------------------------------------------------------------------------------------------------------------------------------------------------------------------------------------------------------------------------------------------------------------------------------------------------------------------------------------------------------------------------------------------------------------------------------------------------------------------------------------------------------------------------------------------------------------------------------------------------------------------------------------------------------------------------------------------------------------------------------------------|-----------------------------------------------|
| <i>Dependent Variables</i>          |                                                                                                                                                                                                                                                                                                                                                                                                                                                                                                                                                                                                                                                                                                                                                                                                                                                        |                                               |
| <b>Crime incidence</b>              | Binary variable indicating whether the firm experienced any losses in the past one year as a result of theft, robbery, vandalism, or arson                                                                                                                                                                                                                                                                                                                                                                                                                                                                                                                                                                                                                                                                                                             | World Bank's Enterprises Survey (WBES)        |
| <b>Crime losses (%)</b>             | Losses from theft, robbery, vandalism, or arson plus security expenses as a percentage of sales revenue                                                                                                                                                                                                                                                                                                                                                                                                                                                                                                                                                                                                                                                                                                                                                |                                               |
| <i>Independent Variable</i>         |                                                                                                                                                                                                                                                                                                                                                                                                                                                                                                                                                                                                                                                                                                                                                                                                                                                        |                                               |
| <b>Income Inequality</b>            | Gini Coefficient, measuring inequality in a range of 0 to 1<br><i>Alternative measures (for robustness tests)</i>                                                                                                                                                                                                                                                                                                                                                                                                                                                                                                                                                                                                                                                                                                                                      | World Bank's Equity Database                  |
|                                     | The income share of the richest 10% of the population in national income.                                                                                                                                                                                                                                                                                                                                                                                                                                                                                                                                                                                                                                                                                                                                                                              | World Bank's Equity Database                  |
| <i>Moderating Variables</i>         |                                                                                                                                                                                                                                                                                                                                                                                                                                                                                                                                                                                                                                                                                                                                                                                                                                                        |                                               |
| <b>Trust</b>                        | Indicates the fraction of people who indicated that "most people can be trusted"                                                                                                                                                                                                                                                                                                                                                                                                                                                                                                                                                                                                                                                                                                                                                                       | World Values Survey & Global Barometer Survey |
|                                     | <i>Instrument for trust (for robustness tests)</i><br><i>Political values polarisation</i> measures the degree of polarisation in political values of the population in six domains related to free choice and control; left/right orientation; income redistribution; private vs. government ownership; individual freedom vs. government support, and free market competition. Each indicator has responses ranging between 1 and 10, from which an Esteban and Ray measure of polarisation is computed using the latest available data from European and World Values Surveys. Political polarisation is measured using the average value of polarisation across the six indicators. In line with Beugelsdijk & Klasing (2006), we also control for the country-average of the political values indicators in addition to the polarisation measure. | European and World Values Surveys             |
| <b>Linguistic Fractionalization</b> | A measure of linguistic diversity based on the inverse of the Herfindahl Index. Indicates the probability that two randomly selected individuals in a country will not belong to the same ethnic group.                                                                                                                                                                                                                                                                                                                                                                                                                                                                                                                                                                                                                                                | Alesina et al. (2003)                         |

---

*Alternative measures (for robustness tests)*

Herfindahl Index, as above, but from an alternative data set.

Desmet et al. (2012)

Linguistic Polarization, a measure of polarization, whereby greater weight is given when there are linguistic groups of equal size

Desmet et al. (2012)

---

***Control Variables***

---

**Poverty rate**

The percentage of the population living on less than \$1.90 a day at 2011 international prices, which is the World Bank's international poverty line.

World Development Indicators Database (WDI)

**GDP per capital**

GDP per capita in Purchasing Power Parity

**GDP growth**

Annual growth rate of income per capita (in PPP)

**Inflation rate**

Annual changes in consumer price index

**Rule of law**

This is a standardized, survey-based indicator of a country's (perceived) level of rule of law, including contract enforcement and control of crime.

World Bank's Governance Indicators Database

**Control of corruption**

This is a standardized, survey-based indicator of a country's (perceived) level of corruption control from public officials.

**Secondary-school enrolment**

Total enrolment in secondary education, regardless of age, expressed as a percentage of the population of official secondary education age.

WDI

**Youth unemployment**

The share of the labour force ages 15-24 without work but available for and seeking employment.

WDI, based on ILO calculations

**Firm Age**

Years elapsed since the establishment of firm

WBES

**Firm Size**

Number of permanent employees in the firm

WBES

**Public firm (binary)**

Indicates if the firm is (partially) state owned

WBES

**Foreign firm (binary)**

Indicates if the firm is (partially) foreign owned

WBES

**Exporting firms (binary)**

Indicates if the firm exports its products.

WBES

**Security payment (binary)**

Indicates whether the firm paid security expenses in the past one year for "equipment, personnel, or professional security services."

WBES

---

Table A2: Robustness check: First stage (OLS) predicting trust levels

|                            | Dependent variable: Interpersonal trust |       |                |         |       |                |         |       |                |
|----------------------------|-----------------------------------------|-------|----------------|---------|-------|----------------|---------|-------|----------------|
|                            | Model 1                                 |       |                | Model 2 |       |                | Model 3 |       |                |
|                            | Coeff.                                  | s.e.  | <i>p</i> value | Coeff.  | s.e.  | <i>p</i> value | Coeff.  | s.e.  | <i>p</i> value |
| Political polarization     | -0.207                                  | 0.047 | 0.000          | -0.121  | 0.056 | 0.036          | -0.114  | 0.054 | 0.041          |
| Political values (average) | 0.022                                   | 0.029 | 0.457          | 0.016   | 0.031 | 0.602          | 0.044   | 0.032 | 0.170          |
| Poverty rate               |                                         |       |                | -0.067  | 0.082 | 0.416          | 0.016   | 0.112 | 0.885          |
| Log (GDP pc)               |                                         |       |                | 0.030   | 0.036 | 0.402          | 0.044   | 0.034 | 0.200          |
| GDP pc growth              |                                         |       |                | 0.009   | 0.015 | 0.558          | 0.008   | 0.017 | 0.641          |
| Inflation                  |                                         |       |                | 0.001   | 0.002 | 0.684          | -0.000  | 0.001 | 0.905          |
| Rule of law                |                                         |       |                | -0.012  | 0.050 | 0.812          | -0.084  | 0.051 | 0.103          |
| Control of corruption      |                                         |       |                | 0.025   | 0.064 | 0.694          | 0.096   | 0.069 | 0.168          |
| Gini                       |                                         |       |                |         |       |                | -0.614  | 0.194 | 0.003          |
| Fractionalization          |                                         |       |                |         |       |                | 0.057   | 0.056 | 0.317          |
| Observations               | 72                                      |       |                | 70      |       |                | 65      |       |                |
| R-squared                  | 0.141                                   |       |                | 0.199   |       |                | 0.355   |       |                |

Note: Robust standard errors are given in parentheses. We included in the regressions both the measure of polarization and the average *levels of responses* for political values, following Beugelsdijk & Klasing (2016). This approach is needed because political values themselves, in addition their dispersion, can influence trust. Moreover, dispersion measures are significantly correlated with average values (coefficient = 0.39; p-value = 0.04).

Table A3: Robustness check: Second stage (probit) using predicted values of trust

|                         | Dependent variable: Crime incidence |       |                |         |       |                |
|-------------------------|-------------------------------------|-------|----------------|---------|-------|----------------|
|                         | Model 1                             |       |                | Model 2 |       |                |
|                         | Coeff.                              | s.e.  | <i>p</i> value | Coeff.  | s.e.  | <i>p</i> value |
| Poverty rate            | 0.519                               | 0.115 | 0.000          | 0.465   | 0.119 | 0.000          |
| Log (GDP pc)            | -0.182                              | 0.041 | 0.000          | -0.096  | 0.052 | 0.063          |
| GDP pc growth           | -0.116                              | 0.009 | 0.000          | -0.103  | 0.011 | 0.000          |
| Inflation               | 0.005                               | 0.001 | 0.000          | 0.005   | 0.001 | 0.000          |
| Rule of law             | 0.047                               | 0.081 | 0.562          | -0.098  | 0.095 | 0.301          |
| Control of corruption   | 0.101                               | 0.082 | 0.218          | 0.234   | 0.093 | 0.012          |
| Log (Firm age)          | 0.035                               | 0.014 | 0.011          | 0.033   | 0.014 | 0.015          |
| Log (Firm size)         | 0.065                               | 0.007 | 0.000          | 0.065   | 0.007 | 0.000          |
| Public dummy            | 0.094                               | 0.058 | 0.105          | 0.101   | 0.057 | 0.079          |
| Foreign dummy           | 0.013                               | 0.021 | 0.533          | 0.006   | 0.021 | 0.792          |
| Exporter dummy          | -0.050                              | 0.019 | 0.007          | -0.052  | 0.019 | 0.005          |
| Security payment        | 0.390                               | 0.016 | 0.000          | 0.393   | 0.016 | 0.000          |
| Gini                    | 4.187                               | 0.530 | 0.000          | 2.218   | 0.745 | 0.003          |
| Predicted trust         | 5.524                               | 1.023 | 0.000          | 3.940   | 1.127 | 0.000          |
| Gini X Predicted trust  | -8.910                              | 2.173 | 0.000          | -8.366  | 2.146 | 0.000          |
| Linguistic frac.        |                                     |       |                | -0.767  | 0.211 | 0.000          |
| Gini X Linguistic frac. |                                     |       |                | 2.207   | 0.559 | 0.000          |
| Industry dummies        | Inc.                                |       |                | Inc.    |       |                |
| Year dummies            | Inc.                                |       |                | Inc.    |       |                |
| Observations            | 89,475                              |       |                | 89,475  |       |                |

Notes: Trust is explained using an indicator of values polarization, Gini, and all cross-country control variables. The results of the first-stage model for predicting trust are reported in Table A2 (above)

Table A4. Robustness check: Probit estimation using income shares of the richest top 10 percent

|                                         | Dependent variable: Crime incidence |       |                |         |       |                |         |       |                |         |       |                |
|-----------------------------------------|-------------------------------------|-------|----------------|---------|-------|----------------|---------|-------|----------------|---------|-------|----------------|
|                                         | Model 1                             |       |                | Model 2 |       |                | Model 3 |       |                | Model 4 |       |                |
|                                         | Coeff.                              | s.e.  | <i>p</i> value | Coeff.  | s.e.  | <i>p</i> value | Coeff.  | s.e.  | <i>p</i> value | Coeff.  | s.e.  | <i>p</i> value |
| Poverty rate                            | 0.455                               | 0.081 | 0.000          | 0.548   | 0.086 | 0.000          | 0.398   | 0.081 | 0.000          | 0.493   | 0.085 | 0.000          |
| Log (GDP pc)                            | -0.070                              | 0.021 | 0.001          | -0.058  | 0.023 | 0.012          | -0.060  | 0.021 | 0.005          | -0.047  | 0.023 | 0.044          |
| GDP pc growth                           | -0.098                              | 0.007 | 0.000          | -0.098  | 0.007 | 0.000          | -0.097  | 0.007 | 0.000          | -0.096  | 0.007 | 0.000          |
| Inflation                               | 0.005                               | 0.001 | 0.000          | 0.005   | 0.001 | 0.000          | 0.006   | 0.001 | 0.000          | 0.006   | 0.001 | 0.000          |
| Rule of law                             | -0.142                              | 0.054 | 0.008          | -0.165  | 0.061 | 0.006          | -0.142  | 0.054 | 0.009          | -0.168  | 0.059 | 0.005          |
| Control of corruption                   | 0.273                               | 0.053 | 0.000          | 0.292   | 0.060 | 0.000          | 0.280   | 0.055 | 0.000          | 0.295   | 0.059 | 0.000          |
| Log (Firm age)                          | 0.043                               | 0.012 | 0.000          | 0.034   | 0.012 | 0.005          | 0.043   | 0.012 | 0.000          | 0.033   | 0.012 | 0.007          |
| Log (Firm size)                         | 0.069                               | 0.006 | 0.000          | 0.073   | 0.006 | 0.000          | 0.067   | 0.006 | 0.000          | 0.071   | 0.006 | 0.000          |
| Public dummy                            | 0.082                               | 0.051 | 0.107          | 0.103   | 0.052 | 0.049          | 0.082   | 0.053 | 0.121          | 0.107   | 0.054 | 0.046          |
| Foreign dummy                           | 0.019                               | 0.017 | 0.285          | 0.006   | 0.018 | 0.726          | 0.015   | 0.018 | 0.384          | -0.002  | 0.019 | 0.895          |
| Exporter dummy                          | -0.032                              | 0.017 | 0.069          | -0.031  | 0.018 | 0.082          | -0.030  | 0.018 | 0.087          | -0.030  | 0.018 | 0.097          |
| Security payment                        | 0.397                               | 0.014 | 0.000          | 0.395   | 0.014 | 0.000          | 0.401   | 0.014 | 0.000          | 0.399   | 0.014 | 0.000          |
| Income share, top 10%                   | 1.868                               | 0.179 | 0.000          | 2.865   | 0.469 | 0.000          | 1.099   | 0.329 | 0.001          | 1.891   | 0.459 | 0.000          |
| Trust                                   |                                     |       |                | 1.632   | 0.709 | 0.021          |         |       |                | 2.150   | 0.711 | 0.003          |
| Income share, top 10% X Trust           |                                     |       |                | -6.157  | 2.291 | 0.007          |         |       |                | -7.927  | 2.311 | 0.001          |
| Linguistic frac.                        |                                     |       |                |         |       |                | -0.284  | 0.179 | 0.113          | -0.590  | 0.200 | 0.003          |
| Income share, top 10%X Linguistic frac. |                                     |       |                |         |       |                | 1.484   | 0.522 | 0.004          | 2.532   | 0.582 | 0.000          |
| Industry dummies                        | Inc.                                |       |                | Inc.    |       |                | Inc.    |       |                | Inc.    |       |                |
| Year dummies                            | Inc.                                |       |                | Inc.    |       |                | Inc.    |       |                | Inc.    |       |                |
| Observations                            | 114,202                             |       |                | 107,484 |       |                | 110,437 |       |                | 103,988 |       |                |

Notes: The standard errors (s.e.) are corrected for potential correlations among firms within the same country-industry clusters.

Table A5: Robustness check: Probit estimation using alternative measures of fractionalization

|                                | Dependent variable: Crime incidence |       |         |         |       |         |         |       |         |         |       |         |
|--------------------------------|-------------------------------------|-------|---------|---------|-------|---------|---------|-------|---------|---------|-------|---------|
|                                | Model 1                             |       |         | Model 2 |       |         | Model 3 |       |         | Model 4 |       |         |
|                                | Coeff.                              | s.e.  | p value | Coeff.  | s.e.  | p value | Coeff.  | s.e.  | p value | Coeff.  | s.e.  | p value |
| Poverty rate                   | 0.320                               | 0.084 | 0.000   | 0.411   | 0.088 | 0.000   | 0.355   | 0.086 | 0.000   | 0.406   | 0.090 | 0.000   |
| Log (GDP pc)                   | -0.103                              | 0.023 | 0.000   | -0.092  | 0.024 | 0.000   | -0.098  | 0.023 | 0.000   | -0.098  | 0.024 | 0.000   |
| GDP pc growth                  | -0.097                              | 0.007 | 0.000   | -0.093  | 0.008 | 0.000   | -0.101  | 0.007 | 0.000   | -0.099  | 0.008 | 0.000   |
| Inflation                      | 0.005                               | 0.001 | 0.000   | 0.006   | 0.001 | 0.000   | 0.005   | 0.001 | 0.000   | 0.006   | 0.001 | 0.000   |
| Rule of law                    | -0.085                              | 0.053 | 0.109   | -0.072  | 0.058 | 0.214   | -0.086  | 0.056 | 0.127   | -0.075  | 0.063 | 0.230   |
| Control of corruption          | 0.215                               | 0.052 | 0.000   | 0.194   | 0.058 | 0.001   | 0.223   | 0.056 | 0.000   | 0.212   | 0.061 | 0.001   |
| Log (Firm age)                 | 0.043                               | 0.012 | 0.000   | 0.034   | 0.012 | 0.005   | 0.041   | 0.012 | 0.001   | 0.031   | 0.012 | 0.009   |
| Log (Firm size)                | 0.068                               | 0.006 | 0.000   | 0.073   | 0.006 | 0.000   | 0.068   | 0.006 | 0.000   | 0.072   | 0.006 | 0.000   |
| Public dummy                   | 0.076                               | 0.052 | 0.146   | 0.100   | 0.054 | 0.061   | 0.085   | 0.052 | 0.106   | 0.108   | 0.054 | 0.044   |
| Foreign dummy                  | 0.006                               | 0.017 | 0.709   | -0.013  | 0.018 | 0.493   | 0.013   | 0.017 | 0.443   | -0.004  | 0.018 | 0.844   |
| Exporter dummy                 | -0.043                              | 0.018 | 0.016   | -0.043  | 0.018 | 0.015   | -0.038  | 0.018 | 0.031   | -0.037  | 0.018 | 0.040   |
| Security payment               | 0.403                               | 0.014 | 0.000   | 0.401   | 0.014 | 0.000   | 0.401   | 0.014 | 0.000   | 0.397   | 0.014 | 0.000   |
| Gini                           | 0.176                               | 0.270 | 0.516   | 1.075   | 0.379 | 0.005   | 0.846   | 0.286 | 0.003   | 2.012   | 0.394 | 0.000   |
| Linguistic frac. alt.          | -1.071                              | 0.194 | 0.000   | -1.463  | 0.216 | 0.000   |         |       |         |         |       |         |
| Trust                          |                                     |       |         | 2.670   | 0.660 | 0.000   |         |       |         | 2.765   | 0.698 | 0.000   |
| Gini X Linguistic frac. alt.   | 2.671                               | 0.425 | 0.000   | 3.618   | 0.471 | 0.000   |         |       |         |         |       |         |
| Gini X Trust                   |                                     |       |         | -7.841  | 1.669 | 0.000   |         |       |         | -7.617  | 1.734 | 0.000   |
| Linguistic polarization        |                                     |       |         |         |       |         | -0.666  | 0.249 | 0.007   | -0.907  | 0.269 | 0.001   |
| Gini X Linguistic polarization |                                     |       |         |         |       |         | 1.639   | 0.563 | 0.004   | 2.281   | 0.613 | 0.000   |
| Industry dummies               | Inc.                                |       |         | Inc.    |       |         | Inc.    |       |         | Inc.    |       |         |
| Year dummies                   | Inc.                                |       |         | Inc.    |       |         | Inc.    |       |         | Inc.    |       |         |
| Observations                   | 113,014                             |       |         | 106,297 |       |         | 113,014 |       |         | 106,297 |       | 0.00    |

Notes: The standard errors reported in parentheses are corrected for potential correlations among firms within the same country-industry clusters.

Table A6. Robustness check: OLS estimations using the percentage of annual revenue related to crime losses and security expenses

|                         | Dependent variable: Crime losses (%) |       |                   |         |       |                   |         |       |                   |         |       |                   |         |       |                   |
|-------------------------|--------------------------------------|-------|-------------------|---------|-------|-------------------|---------|-------|-------------------|---------|-------|-------------------|---------|-------|-------------------|
|                         | Model 1                              |       |                   | Model 2 |       |                   | Model 3 |       |                   | Model 4 |       |                   | Model 5 |       |                   |
|                         | Coeff.                               | s.e.  | <i>p</i><br>value | Coeff.  | s.e.  | <i>p</i><br>value | Coeff.  | s.e.  | <i>p</i><br>value | Coeff.  | s.e.  | <i>p</i><br>value | Coeff.  | s.e.  | <i>p</i><br>value |
| Poverty rate            | 2.828                                | 0.287 | 0.000             | 2.326   | 0.875 | 0.009             | 2.540   | 0.328 | 0.000             | 2.127   | 0.313 | 0.000             | 2.435   | 0.335 | 0.000             |
| Log (GDP pc)            | 0.124                                | 0.078 | 0.111             | 0.068   | 0.237 | 0.775             | 0.134   | 0.085 | 0.117             | 0.097   | 0.082 | 0.237             | 0.172   | 0.086 | 0.046             |
| GDP pc growth           | -0.214                               | 0.015 | 0.000             | -0.214  | 0.036 | 0.000             | -0.197  | 0.016 | 0.000             | -0.216  | 0.014 | 0.000             | -0.193  | 0.016 | 0.000             |
| Inflation               | -0.006                               | 0.004 | 0.191             | -0.001  | 0.015 | 0.948             | -0.001  | 0.004 | 0.747             | 0.002   | 0.005 | 0.718             | 0.001   | 0.004 | 0.839             |
| Rule of law             | -0.589                               | 0.133 | 0.000             | -0.444  | 0.375 | 0.239             | -0.552  | 0.145 | 0.000             | -0.443  | 0.135 | 0.001             | -0.569  | 0.147 | 0.000             |
| Control of corruption   | 0.055                                | 0.116 | 0.639             | -0.099  | 0.282 | 0.727             | -0.031  | 0.118 | 0.795             | -0.089  | 0.116 | 0.443             | -0.023  | 0.124 | 0.851             |
| Log (Firm age)          | 0.015                                | 0.029 | 0.599             | 0.002   | 0.036 | 0.952             | -0.010  | 0.029 | 0.733             | 0.010   | 0.028 | 0.714             | -0.004  | 0.029 | 0.900             |
| Log (Firm size)         | -0.167                               | 0.015 | 0.000             | -0.168  | 0.037 | 0.000             | -0.158  | 0.014 | 0.000             | -0.155  | 0.015 | 0.000             | -0.145  | 0.014 | 0.000             |
| Public dummy            | 1.176                                | 0.287 | 0.000             | 1.227   | 0.737 | 0.099             | 1.213   | 0.297 | 0.000             | 1.224   | 0.291 | 0.000             | 1.251   | 0.304 | 0.000             |
| Foreign dummy           | 0.033                                | 0.056 | 0.550             | 0.012   | 0.092 | 0.899             | 0.018   | 0.059 | 0.752             | 0.015   | 0.057 | 0.798             | 0.011   | 0.059 | 0.857             |
| Exporter dummy          | 0.169                                | 0.049 | 0.001             | 0.183   | 0.118 | 0.123             | 0.174   | 0.049 | 0.000             | 0.187   | 0.050 | 0.000             | 0.180   | 0.050 | 0.000             |
| Security payment        | 1.565                                | 0.049 | 0.000             | 1.559   | 0.141 | 0.000             | 1.530   | 0.050 | 0.000             | 1.539   | 0.049 | 0.000             | 1.507   | 0.050 | 0.000             |
| Gini                    |                                      |       |                   | 3.190   | 1.002 | 0.002             | 3.611   | 0.896 | 0.000             | 1.270   | 0.618 | 0.040             | 2.109   | 0.971 | 0.030             |
| Trust                   |                                      |       |                   |         |       |                   | 1.310   | 1.388 | 0.345             |         |       |                   | 2.510   | 1.287 | 0.051             |
| Gini X Trust            |                                      |       |                   |         |       |                   | -6.452  | 3.709 | 0.082             |         |       |                   | -9.062  | 3.457 | 0.009             |
| Linguistic frac.        |                                      |       |                   |         |       |                   |         |       |                   | -1.444  | 0.465 | 0.002             | -1.552  | 0.463 | 0.001             |
| Gini X Linguistic frac. |                                      |       |                   |         |       |                   |         |       |                   | 4.740   | 1.135 | 0.000             | 4.934   | 1.112 | 0.000             |
| Industry dummies        | Inc.                                 |       |                   | Inc.    |       |                   | Inc.    |       |                   | Inc.    |       |                   | Inc.    |       |                   |
| Year dummies            | Inc.                                 |       |                   | Inc.    |       |                   | Inc.    |       |                   | Inc.    |       |                   | Inc.    |       |                   |
| Observations            | 111,213                              |       |                   | 111,213 |       |                   | 104,640 |       |                   | 107,604 |       |                   | 101,297 |       |                   |
| R-squared               | 0.066                                |       |                   | 0.068   |       |                   | 0.069   |       |                   | 0.071   |       |                   | 0.071   |       |                   |

Notes: Crime losses include positive losses by firms that experienced crime and zero losses by firms that did not. The standard errors reported in parentheses are corrected for potential correlations among firms within the same country-industry clusters.

Table A7. Robustness checks: Probit estimates controlling for educational and employment opportunities

|                            | Dependent variable: Crime incidence |       |                |         |       |                |         |       |                |         |       |                |
|----------------------------|-------------------------------------|-------|----------------|---------|-------|----------------|---------|-------|----------------|---------|-------|----------------|
|                            | Model 1                             |       |                | Model 2 |       |                | Model 3 |       |                | Model 4 |       |                |
|                            | Coeff.                              | s.e.  | <i>p</i> value | Coeff.  | s.e.  | <i>p</i> value | Coeff.  | s.e.  | <i>p</i> value | Coeff.  | s.e.  | <i>p</i> value |
| Secondary-school enrolment | -0.337                              | 0.080 | 0.000          | -0.566  | 0.098 | 0.000          | -0.239  | 0.079 | 0.003          | -0.487  | 0.097 | 0.000          |
| Youth unemployment         | -0.774                              | 0.134 | 0.000          | -0.554  | 0.128 | 0.000          | -1.083  | 0.153 | 0.000          | -0.849  | 0.136 | 0.000          |
| Poverty rate               | 0.201                               | 0.086 | 0.020          | 0.217   | 0.101 | 0.032          | 0.182   | 0.083 | 0.028          | 0.254   | 0.091 | 0.005          |
| Log (GDP pc)               | -0.026                              | 0.025 | 0.295          | 0.014   | 0.029 | 0.624          | -0.029  | 0.026 | 0.254          | 0.023   | 0.029 | 0.435          |
| GDP pc growth              | -0.108                              | 0.007 | 0.000          | -0.103  | 0.008 | 0.000          | -0.106  | 0.007 | 0.000          | -0.098  | 0.008 | 0.000          |
| Inflation                  | 0.006                               | 0.001 | 0.000          | 0.007   | 0.001 | 0.000          | 0.008   | 0.001 | 0.000          | 0.009   | 0.001 | 0.000          |
| Rule of law                | -0.098                              | 0.052 | 0.058          | -0.136  | 0.059 | 0.020          | -0.093  | 0.052 | 0.071          | -0.143  | 0.057 | 0.013          |
| Control of corruption      | 0.282                               | 0.052 | 0.000          | 0.325   | 0.059 | 0.000          | 0.287   | 0.053 | 0.000          | 0.334   | 0.059 | 0.000          |
| Log (Firm age)             | 0.034                               | 0.012 | 0.004          | 0.025   | 0.012 | 0.037          | 0.032   | 0.012 | 0.009          | 0.022   | 0.013 | 0.089          |
| Log (Firm size)            | 0.072                               | 0.006 | 0.000          | 0.077   | 0.006 | 0.000          | 0.069   | 0.006 | 0.000          | 0.075   | 0.006 | 0.000          |
| Public dummy               | 0.107                               | 0.053 | 0.044          | 0.124   | 0.055 | 0.023          | 0.102   | 0.055 | 0.063          | 0.122   | 0.056 | 0.029          |
| Foreign dummy              | 0.012                               | 0.018 | 0.502          | 0.001   | 0.019 | 0.975          | 0.006   | 0.018 | 0.736          | -0.014  | 0.019 | 0.471          |
| Exporter dummy             | -0.039                              | 0.018 | 0.028          | -0.038  | 0.018 | 0.033          | -0.043  | 0.018 | 0.016          | -0.044  | 0.018 | 0.016          |
| Security payment           | 0.397                               | 0.014 | 0.000          | 0.397   | 0.014 | 0.000          | 0.403   | 0.014 | 0.000          | 0.403   | 0.014 | 0.000          |
| Gini                       | 1.783                               | 0.159 | 0.000          | 3.120   | 0.420 | 0.000          | 0.569   | 0.247 | 0.021          | 1.940   | 0.378 | 0.000          |
| Trust                      |                                     |       |                | 2.545   | 0.727 | 0.000          |         |       |                | 3.508   | 0.715 | 0.000          |
| Gini X Trust               |                                     |       |                | -7.564  | 1.832 | 0.000          |         |       |                | -10.349 | 1.839 | 0.000          |
| Linguistic frac.           |                                     |       |                |         |       |                | -1.060  | 0.193 | 0.000          | -1.466  | 0.207 | 0.000          |
| Gini X Linguistic frac.    |                                     |       |                |         |       |                | 2.912   | 0.437 | 0.000          | 3.956   | 0.465 | 0.000          |
| Industry dummies           | Inc.                                |       |                | Inc.    |       |                | Inc.    |       |                | Inc.    |       |                |
| Year dummies               | Inc.                                |       |                | Inc.    |       |                | Inc.    |       |                | Inc.    |       |                |
| Observations               | 109,543                             |       |                | 102,891 |       |                | 106,230 |       |                | 99,846  |       |                |

Notes: The reported standard errors (s.e.) are corrected for potential correlations among firms within the same country-industry clusters.



Table A8. Robustness checks: OLS estimations using the average crime incidence at regional level

|                         | Dependent variable: Average crime incidence |       |                   |         |       |                   |         |       |                   |         |       |                   |         |       |                   |
|-------------------------|---------------------------------------------|-------|-------------------|---------|-------|-------------------|---------|-------|-------------------|---------|-------|-------------------|---------|-------|-------------------|
|                         | Model 1                                     |       |                   | Model 2 |       |                   | Model 3 |       |                   | Model 4 |       |                   | Model 5 |       |                   |
|                         | Coeff.                                      | s.e.  | <i>p</i><br>value | Coeff.  | s.e.  | <i>p</i><br>value | Coeff.  | s.e.  | <i>p</i><br>value | Coeff.  | s.e.  | <i>p</i><br>value | Coeff.  | s.e.  | <i>p</i><br>value |
| Poverty rate            | 0.177                                       | 0.034 | 0.000             | 0.109   | 0.035 | 0.002             | 0.121   | 0.036 | 0.001             | 0.126   | 0.037 | 0.001             | 0.142   | 0.038 | 0.000             |
| Log (GDP pc)            | -0.015                                      | 0.010 | 0.143             | -0.021  | 0.010 | 0.028             | -0.012  | 0.011 | 0.266             | -0.016  | 0.010 | 0.106             | -0.006  | 0.011 | 0.545             |
| GDP pc growth           | -0.030                                      | 0.003 | 0.000             | -0.029  | 0.002 | 0.000             | -0.025  | 0.003 | 0.000             | -0.029  | 0.002 | 0.000             | -0.023  | 0.003 | 0.000             |
| Inflation               | 0.002                                       | 0.001 | 0.004             | 0.002   | 0.001 | 0.000             | 0.003   | 0.001 | 0.000             | 0.002   | 0.001 | 0.000             | 0.003   | 0.001 | 0.000             |
| Rule of law             | -0.006                                      | 0.023 | 0.808             | 0.030   | 0.023 | 0.186             | 0.034   | 0.026 | 0.186             | 0.037   | 0.024 | 0.128             | 0.045   | 0.028 | 0.102             |
| Control of corruption   | 0.067                                       | 0.023 | 0.003             | 0.029   | 0.023 | 0.206             | 0.016   | 0.027 | 0.550             | 0.022   | 0.024 | 0.370             | 0.003   | 0.029 | 0.921             |
| Gini                    |                                             |       |                   | 0.461   | 0.065 | 0.000             | 1.100   | 0.148 | 0.000             | 0.566   | 0.100 | 0.000             | 1.175   | 0.168 | 0.000             |
| Trust                   |                                             |       |                   |         |       |                   | 1.158   | 0.241 | 0.000             |         |       |                   | 1.290   | 0.268 | 0.000             |
| Gini X Trust            |                                             |       |                   |         |       |                   | -3.003  | 0.613 | 0.000             |         |       |                   | -3.299  | 0.682 | 0.000             |
| Linguistic frac.        |                                             |       |                   |         |       |                   |         |       |                   | 0.116   | 0.075 | 0.123             | -0.001  | 0.081 | 0.994             |
| Gini X Linguistic frac. |                                             |       |                   |         |       |                   |         |       |                   | -0.264  | 0.186 | 0.156             | 0.009   | 0.198 | 0.962             |
| Observations            | 654                                         |       |                   | 654     |       |                   | 595     |       |                   | 624     |       |                   | 567     |       |                   |

Note: Robust standard errors (s.e.) are reported in all models.

Table A9. Robustness checks: OLS regression estimations using the average crime incidence at regional level and alternative measures of fractionalization

|                                | Dependent variable: Average crime incidence |       |                |         |       |                |         |       |                |         |       |                |
|--------------------------------|---------------------------------------------|-------|----------------|---------|-------|----------------|---------|-------|----------------|---------|-------|----------------|
|                                | Model 1                                     |       |                | Model 2 |       |                | Model 3 |       |                | Model 4 |       |                |
|                                | Coeff.                                      | s.e.  | <i>p</i> value | Coeff.  | s.e.  | <i>p</i> value | Coeff.  | s.e.  | <i>p</i> value | Coeff.  | s.e.  | <i>p</i> value |
| Poverty rate                   | 0.120                                       | 0.038 | 0.002          | 0.156   | 0.039 | 0.000          | 0.096   | 0.036 | 0.009          | 0.095   | 0.038 | 0.012          |
| Log (GDP pc)                   | -0.025                                      | 0.010 | 0.012          | -0.011  | 0.011 | 0.309          | -0.023  | 0.010 | 0.023          | -0.016  | 0.011 | 0.139          |
| GDP pc growth                  | -0.027                                      | 0.003 | 0.000          | -0.018  | 0.003 | 0.000          | -0.028  | 0.002 | 0.000          | -0.024  | 0.003 | 0.000          |
| Inflation                      | 0.003                                       | 0.001 | 0.000          | 0.003   | 0.001 | 0.000          | 0.003   | 0.001 | 0.000          | 0.003   | 0.001 | 0.000          |
| Rule of law                    | 0.030                                       | 0.022 | 0.176          | 0.041   | 0.025 | 0.105          | 0.027   | 0.022 | 0.225          | 0.036   | 0.026 | 0.164          |
| Control of corruption          | 0.025                                       | 0.022 | 0.268          | -0.002  | 0.027 | 0.950          | 0.029   | 0.022 | 0.191          | 0.011   | 0.027 | 0.690          |
| Gini                           | 0.295                                       | 0.118 | 0.013          | 0.939   | 0.170 | 0.000          | 0.376   | 0.145 | 0.010          | 1.011   | 0.175 | 0.000          |
| Linguistic frac. alt.          | -0.189                                      | 0.087 | 0.031          | -0.335  | 0.092 | 0.000          |         |       |                |         |       |                |
| Trust                          |                                             |       |                | 1.367   | 0.263 | 0.000          |         |       |                | 1.398   | 0.273 | 0.000          |
| Gini X Linguistic frac. alt.   | 0.361                                       | 0.206 | 0.081          | 0.640   | 0.216 | 0.003          |         |       |                |         |       |                |
| Gini X Trust                   |                                             |       |                | -3.607  | 0.668 | 0.000          |         |       |                | -3.591  | 0.685 | 0.000          |
| Linguistic polarization        |                                             |       |                |         |       |                | -0.095  | 0.118 | 0.420          | -0.230  | 0.117 | 0.051          |
| Gini X Linguistic polarization |                                             |       |                |         |       |                | 0.134   | 0.300 | 0.656          | 0.548   | 0.298 | 0.066          |
| Observations                   | 638                                         |       |                | 579     |       |                | 638     |       |                | 579     |       |                |
| R-squared                      | 0.340                                       |       |                | 0.408   |       |                | 0.336   |       |                | 0.388   |       |                |

Table A10. Robustness checks: Mixed-effects probit estimations

|                         | Dependent variable: Crime incidence |       |                   |         |       |                   |         |       |                   |         |       |                   |         |       |                   |
|-------------------------|-------------------------------------|-------|-------------------|---------|-------|-------------------|---------|-------|-------------------|---------|-------|-------------------|---------|-------|-------------------|
|                         | Model 1                             |       |                   | Model 2 |       |                   | Model 3 |       |                   | Model 4 |       |                   | Model 5 |       |                   |
|                         | Coeff.                              | s.e.  | <i>p</i><br>value | Coeff.  | s.e.  | <i>p</i><br>value | Coeff.  | s.e.  | <i>p</i><br>value | Coeff.  | s.e.  | <i>p</i><br>value | Coeff.  | s.e.  | <i>p</i><br>value |
| Poverty rate            | 0.664                               | 0.283 | 0.019             | 0.388   | 0.274 | 0.156             | 0.717   | 0.279 | 0.010             | 0.459   | 0.298 | 0.123             | 0.770   | 0.289 | 0.008             |
| Log (GDP pc)            | -0.095                              | 0.070 | 0.176             | -0.128  | 0.067 | 0.056             | -0.016  | 0.067 | 0.811             | -0.103  | 0.070 | 0.144             | 0.012   | 0.071 | 0.869             |
| GDP pc growth           | -0.099                              | 0.021 | 0.000             | -0.099  | 0.019 | 0.000             | -0.082  | 0.020 | 0.000             | -0.095  | 0.019 | 0.000             | -0.075  | 0.019 | 0.000             |
| Inflation               | 0.005                               | 0.005 | 0.291             | 0.007   | 0.004 | 0.075             | 0.007   | 0.003 | 0.022             | 0.007   | 0.004 | 0.062             | 0.008   | 0.003 | 0.009             |
| Rule of law             | -0.152                              | 0.131 | 0.246             | -0.032  | 0.120 | 0.788             | -0.100  | 0.152 | 0.510             | -0.016  | 0.133 | 0.907             | -0.138  | 0.165 | 0.401             |
| Control of corruption   | 0.311                               | 0.129 | 0.016             | 0.187   | 0.119 | 0.117             | 0.224   | 0.151 | 0.139             | 0.181   | 0.136 | 0.181             | 0.273   | 0.170 | 0.108             |
| Log (Firm age)          | 0.030                               | 0.013 | 0.022             | 0.030   | 0.013 | 0.024             | 0.028   | 0.013 | 0.035             | 0.031   | 0.014 | 0.024             | 0.028   | 0.014 | 0.036             |
| Log (Firm size)         | 0.082                               | 0.009 | 0.000             | 0.082   | 0.009 | 0.000             | 0.084   | 0.010 | 0.000             | 0.079   | 0.010 | 0.000             | 0.080   | 0.010 | 0.000             |
| Public dummy            | 0.042                               | 0.098 | 0.668             | 0.043   | 0.098 | 0.660             | 0.056   | 0.102 | 0.588             | 0.041   | 0.102 | 0.685             | 0.057   | 0.105 | 0.585             |
| Foreign dummy           | -0.030                              | 0.023 | 0.198             | -0.030  | 0.023 | 0.197             | -0.027  | 0.025 | 0.277             | -0.028  | 0.024 | 0.238             | -0.025  | 0.025 | 0.329             |
| Exporter dummy          | -0.070                              | 0.025 | 0.005             | -0.069  | 0.025 | 0.005             | -0.071  | 0.025 | 0.005             | -0.064  | 0.025 | 0.013             | -0.064  | 0.026 | 0.014             |
| Security payment        | 0.380                               | 0.019 | 0.000             | 0.380   | 0.019 | 0.000             | 0.384   | 0.020 | 0.000             | 0.379   | 0.020 | 0.000             | 0.384   | 0.021 | 0.000             |
| Gini                    |                                     |       |                   | 1.831   | 0.407 | 0.000             | 3.172   | 0.824 | 0.000             | 2.439   | 0.739 | 0.001             | 3.196   | 0.966 | 0.001             |
| Trust                   |                                     |       |                   |         |       |                   | 2.575   | 1.164 | 0.027             |         |       |                   | 2.432   | 1.259 | 0.053             |
| Gini X Trust            |                                     |       |                   |         |       |                   | -7.952  | 3.111 | 0.011             |         |       |                   | -0.075  | 0.034 | 0.026             |
| Linguistic frac.        |                                     |       |                   |         |       |                   |         |       |                   | 0.665   | 0.565 | 0.240             | 0.282   | 0.577 | 0.625             |
| Gini X Linguistic frac. |                                     |       |                   |         |       |                   |         |       |                   | -1.424  | 1.239 | 0.250             | -0.004  | 0.013 | 0.772             |
| Industry dummies        | Inc.                                |       |                   | Inc.    |       |                   | Inc.    |       |                   | Inc.    |       |                   | Inc.    |       |                   |
| Year dummies            | Inc.                                |       |                   | Inc.    |       |                   | Inc.    |       |                   | Inc.    |       |                   | Inc.    |       |                   |
| Observations            | 114,202                             |       |                   | 114,202 |       |                   | 107,484 |       |                   | 110,437 |       |                   | 103,988 |       |                   |
| Number of groups        | 115                                 |       |                   | 115     |       |                   | 96      |       |                   | 108     |       |                   | 90      |       |                   |

Note: Robust standard errors (s.e.) are reported.

Table A11. Post-hoc analysis of foreign-owned firms

|                         | Dependent variable: Crime incidence |       |                |         |       |                |         |       |                |         |       |                |         |       |                |
|-------------------------|-------------------------------------|-------|----------------|---------|-------|----------------|---------|-------|----------------|---------|-------|----------------|---------|-------|----------------|
|                         | Model 1                             |       |                | Model 2 |       |                | Model 3 |       |                | Model 4 |       |                | Model 5 |       |                |
|                         | Coeff.                              | s.e.  | <i>p</i> value | Coeff.  | s.e.  | <i>p</i> value | Coeff.  | s.e.  | <i>p</i> value | Coeff.  | s.e.  | <i>p</i> value | Coeff.  | s.e.  | <i>p</i> value |
| Poverty rate            | 0.330                               | 0.157 | 0.036          | 0.142   | 0.161 | 0.377          | 0.495   | 0.179 | 0.006          | 0.173   | 0.161 | 0.283          | 0.539   | 0.182 | 0.003          |
| Log (GDP pc)            | -0.115                              | 0.043 | 0.008          | -0.137  | 0.043 | 0.002          | -0.062  | 0.050 | 0.217          | -0.113  | 0.044 | 0.010          | -0.033  | 0.052 | 0.526          |
| GDP pc growth           | -0.057                              | 0.012 | 0.000          | -0.063  | 0.012 | 0.000          | -0.050  | 0.014 | 0.000          | -0.068  | 0.013 | 0.000          | -0.053  | 0.015 | 0.000          |
| Inflation               | 0.005                               | 0.002 | 0.017          | 0.006   | 0.002 | 0.002          | 0.006   | 0.002 | 0.003          | 0.008   | 0.002 | 0.000          | 0.007   | 0.002 | 0.001          |
| Rule of law             | 0.077                               | 0.078 | 0.324          | 0.133   | 0.079 | 0.093          | 0.115   | 0.091 | 0.205          | 0.146   | 0.083 | 0.078          | 0.103   | 0.094 | 0.272          |
| Control of corruption   | 0.082                               | 0.075 | 0.275          | 0.033   | 0.076 | 0.667          | 0.010   | 0.087 | 0.906          | 0.044   | 0.081 | 0.583          | 0.033   | 0.092 | 0.720          |
| Log (Firm age)          | -0.001                              | 0.029 | 0.980          | -0.005  | 0.029 | 0.872          | -0.015  | 0.030 | 0.623          | 0.002   | 0.029 | 0.958          | -0.010  | 0.031 | 0.749          |
| Log (Firm size)         | 0.094                               | 0.012 | 0.000          | 0.097   | 0.012 | 0.000          | 0.109   | 0.012 | 0.000          | 0.098   | 0.012 | 0.000          | 0.112   | 0.013 | 0.000          |
| Public dummy            | 0.226                               | 0.087 | 0.009          | 0.243   | 0.087 | 0.005          | 0.266   | 0.089 | 0.003          | 0.236   | 0.087 | 0.007          | 0.265   | 0.090 | 0.003          |
| Exporting dummy         | -0.113                              | 0.034 | 0.001          | -0.110  | 0.034 | 0.001          | -0.108  | 0.034 | 0.002          | -0.113  | 0.034 | 0.001          | -0.113  | 0.035 | 0.001          |
| Security payment        | 0.429                               | 0.042 | 0.000          | 0.420   | 0.042 | 0.000          | 0.395   | 0.045 | 0.000          | 0.406   | 0.043 | 0.000          | 0.374   | 0.046 | 0.000          |
| Gini                    |                                     |       |                | 1.368   | 0.273 | 0.000          | 2.166   | 0.548 | 0.000          | 1.621   | 0.558 | 0.004          | 1.586   | 0.782 | 0.043          |
| Trust                   |                                     |       |                |         |       |                | 2.327   | 0.911 | 0.011          |         |       |                | 2.175   | 0.926 | 0.019          |
| Gini X Trust            |                                     |       |                |         |       |                | -7.161  | 2.389 | 0.003          |         |       |                | -6.393  | 2.442 | 0.009          |
| Linguistic frac.        |                                     |       |                |         |       |                |         |       |                | 0.541   | 0.395 | 0.171          | 0.043   | 0.407 | 0.915          |
| Gini X Linguistic frac. |                                     |       |                |         |       |                |         |       |                | -0.749  | 0.925 | 0.418          | 0.583   | 0.957 | 0.542          |
| Industry dummies        | Inc.                                |       |                | Inc.    |       |                | Inc.    |       |                | Inc.    |       |                | Inc.    |       |                |
| Year dummies            | Inc.                                |       |                | Inc.    |       |                | Inc.    |       |                | Inc.    |       |                | Inc.    |       |                |
| Observations            | 11,220                              |       |                | 11,220  |       |                | 10,283  |       |                | 10,799  |       |                | 9,890   |       |                |

Note: The reported standard errors (s.e.) are corrected for potential correlations among firms within the same country-industry clusters.

Table A12. Post-hoc analysis of exporting firms

|                         | Dependent variable: Crime incidence |       |                |         |       |                |         |       |                |         |       |                |         |       |                |
|-------------------------|-------------------------------------|-------|----------------|---------|-------|----------------|---------|-------|----------------|---------|-------|----------------|---------|-------|----------------|
|                         | Model 1                             |       |                | Model 2 |       |                | Model 3 |       |                | Model 4 |       |                | Model 5 |       |                |
|                         | Coeff.                              | s.e.  | <i>p</i> value | Coeff.  | s.e.  | <i>p</i> value | Coeff.  | s.e.  | <i>p</i> value | Coeff.  | s.e.  | <i>p</i> value | Coeff.  | s.e.  | <i>p</i> value |
| Poverty rate            | 1.227                               | 0.161 | 0.000          | 0.958   | 0.168 | 0.000          | 0.966   | 0.181 | 0.000          | 0.905   | 0.154 | 0.000          | 0.952   | 0.166 | 0.000          |
| Log (GDP pc)            | -0.009                              | 0.039 | 0.815          | -0.048  | 0.040 | 0.228          | -0.057  | 0.044 | 0.193          | -0.015  | 0.040 | 0.717          | -0.013  | 0.044 | 0.769          |
| GDP pc growth           | -0.096                              | 0.011 | 0.000          | -0.104  | 0.011 | 0.000          | -0.105  | 0.012 | 0.000          | -0.102  | 0.011 | 0.000          | -0.100  | 0.011 | 0.000          |
| Inflation               | 0.002                               | 0.002 | 0.323          | 0.004   | 0.002 | 0.045          | 0.004   | 0.002 | 0.025          | 0.005   | 0.002 | 0.006          | 0.005   | 0.002 | 0.004          |
| Rule of law             | -0.074                              | 0.075 | 0.320          | -0.009  | 0.077 | 0.907          | -0.016  | 0.088 | 0.854          | -0.024  | 0.076 | 0.757          | -0.039  | 0.085 | 0.647          |
| Control of corruption   | 0.147                               | 0.070 | 0.035          | 0.104   | 0.073 | 0.153          | 0.129   | 0.084 | 0.123          | 0.126   | 0.070 | 0.073          | 0.152   | 0.081 | 0.059          |
| Log (Firm age)          | 0.108                               | 0.023 | 0.000          | 0.103   | 0.023 | 0.000          | 0.093   | 0.024 | 0.000          | 0.093   | 0.024 | 0.000          | 0.084   | 0.024 | 0.001          |
| Log (Firm size)         | 0.026                               | 0.010 | 0.008          | 0.026   | 0.010 | 0.006          | 0.030   | 0.010 | 0.002          | 0.030   | 0.010 | 0.002          | 0.034   | 0.010 | 0.001          |
| Public dummy            | 0.221                               | 0.071 | 0.002          | 0.242   | 0.071 | 0.001          | 0.262   | 0.072 | 0.000          | 0.246   | 0.071 | 0.001          | 0.265   | 0.073 | 0.000          |
| Foreign dummy           | 0.004                               | 0.027 | 0.878          | -0.006  | 0.027 | 0.821          | -0.018  | 0.028 | 0.507          | -0.012  | 0.028 | 0.659          | -0.027  | 0.029 | 0.354          |
| Security payment        | 0.355                               | 0.029 | 0.000          | 0.354   | 0.028 | 0.000          | 0.354   | 0.030 | 0.000          | 0.345   | 0.029 | 0.000          | 0.343   | 0.030 | 0.000          |
| Gini                    |                                     |       |                | 1.450   | 0.238 | 0.000          | 2.057   | 0.525 | 0.000          | 0.293   | 0.402 | 0.466          | 0.732   | 0.584 | 0.210          |
| Trust                   |                                     |       |                |         |       |                | 1.135   | 0.827 | 0.170          |         |       |                | 1.176   | 0.791 | 0.137          |
| Gini X Trust            |                                     |       |                |         |       |                | -3.227  | 2.277 | 0.156          |         |       |                | -3.092  | 2.147 | 0.150          |
| Linguistic frac.        |                                     |       |                |         |       |                |         |       |                | -0.367  | 0.292 | 0.209          | -0.450  | 0.293 | 0.124          |
| Gini X Linguistic frac. |                                     |       |                |         |       |                |         |       |                | 1.824   | 0.695 | 0.009          | 2.084   | 0.702 | 0.003          |
| Industry dummies        | Inc.                                |       |                | Inc.    |       |                | Inc.    |       |                | Inc.    |       |                | Inc.    |       |                |
| Year dummies            | Inc.                                |       |                | Inc.    |       |                | Inc.    |       |                | Inc.    |       |                | Inc.    |       |                |
| Observations            | 22,224                              |       |                | 22,224  |       |                | 21,253  |       |                | 21,383  |       |                | 20,461  |       |                |

Note: The reported standard errors (s.e.) are corrected for potential correlations among firms within the same country-industry clusters.

Figure A1. The Marginal Effects of Income Inequality on the Percentage Share of Revenue Losses from Crime and Security Expenses

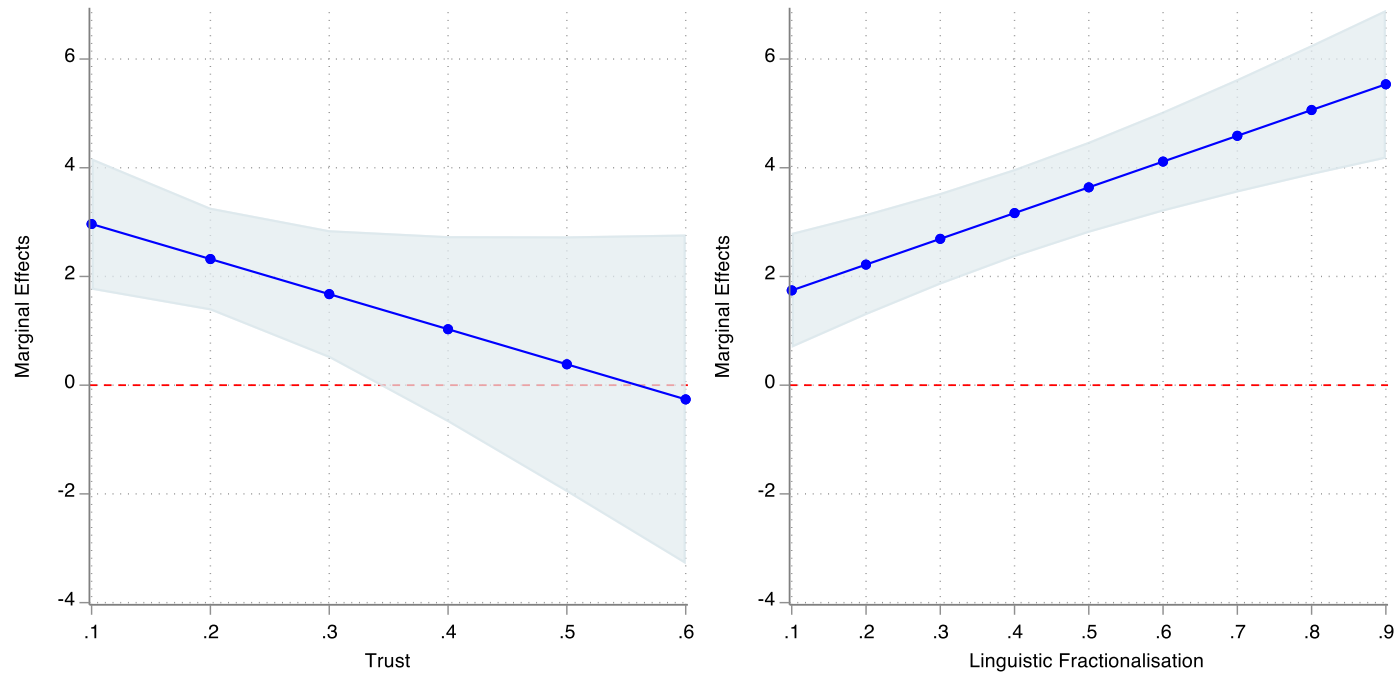

Notes: Comparing a country at the first quartile in the distribution of trust (0.13) with one at the third quartile (0.26), the marginal effect of inequality on crime losses declines from 2.8 per cent to 1.9 per cent, or a one-percentage point in sales revenue. In contrast, the marginal effect of inequality more than doubles (from 2.2 percent to 4.7 percent) as linguistic fractionalization increased from the first quartile (0.19) to the third (0.72).
